# Supplementary material
Source: PubMed Central journal article supplement (PMC3492734)

# Source Data for Figure 5 B

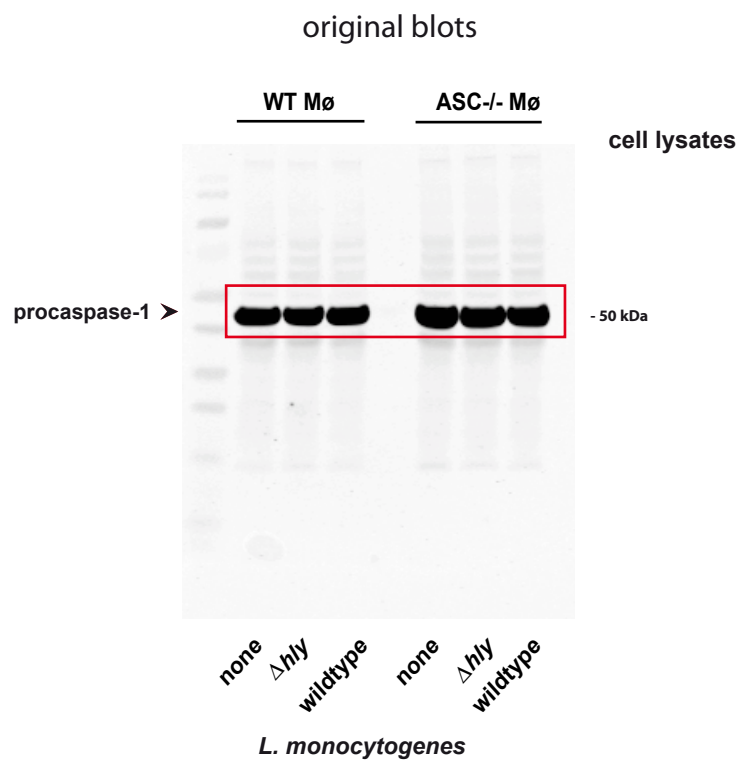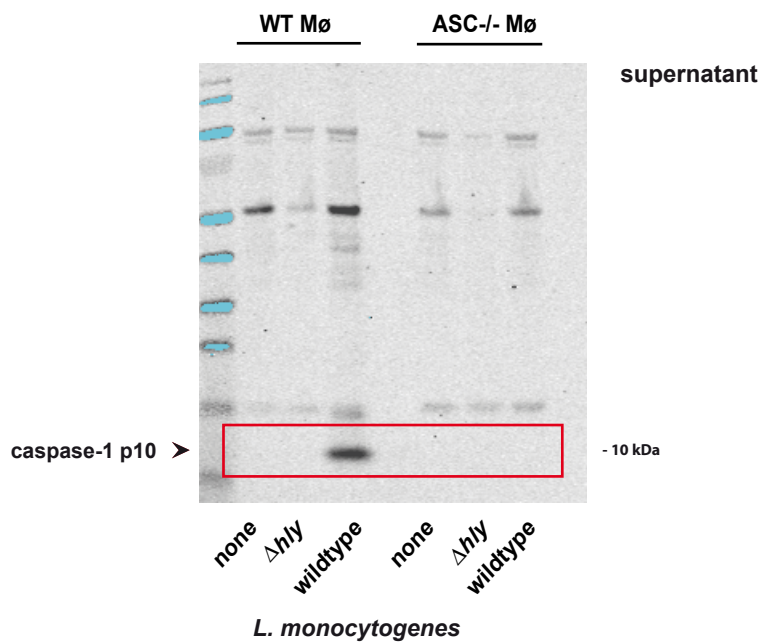

Supplement: emboj2012274s3.pdf [file emboj2012274s3.pdf]

# Source Data for Figure 5 D

original blots

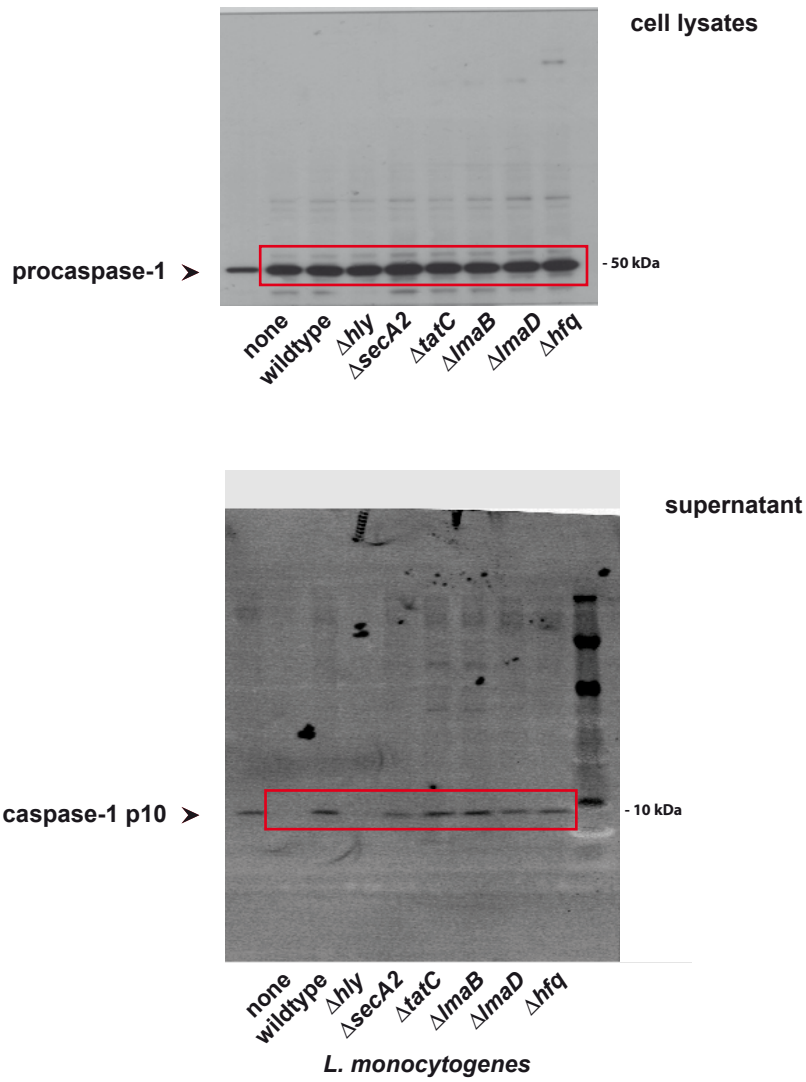

Supplement: emboj2012274s4.pdf [file emboj2012274s4.pdf]

# Source Data for Figure 5 F

original blots

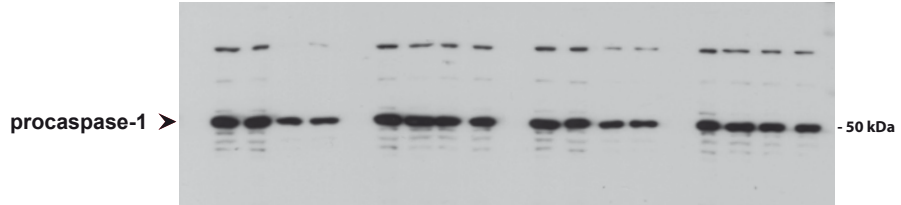

cell lysates

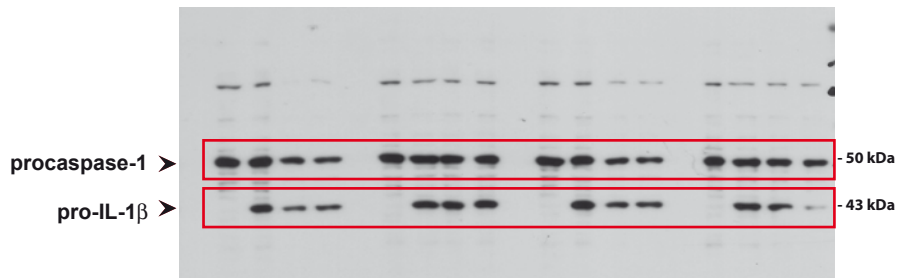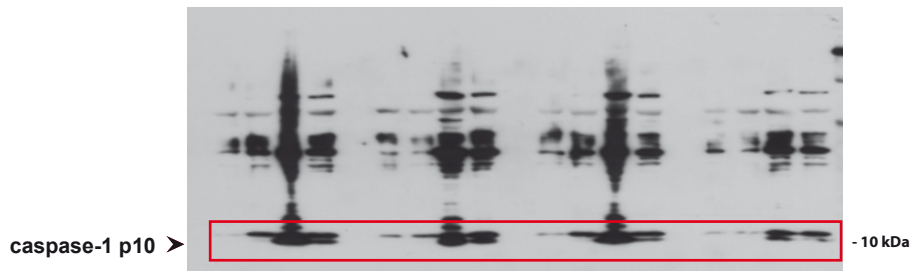

supernatant

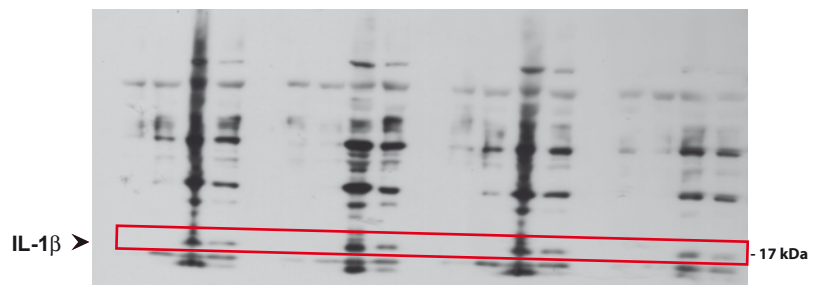

Supplement: emboj2012274s5.pdf [file emboj2012274s5.pdf]

# Source Data for Figure 5 H

original blots

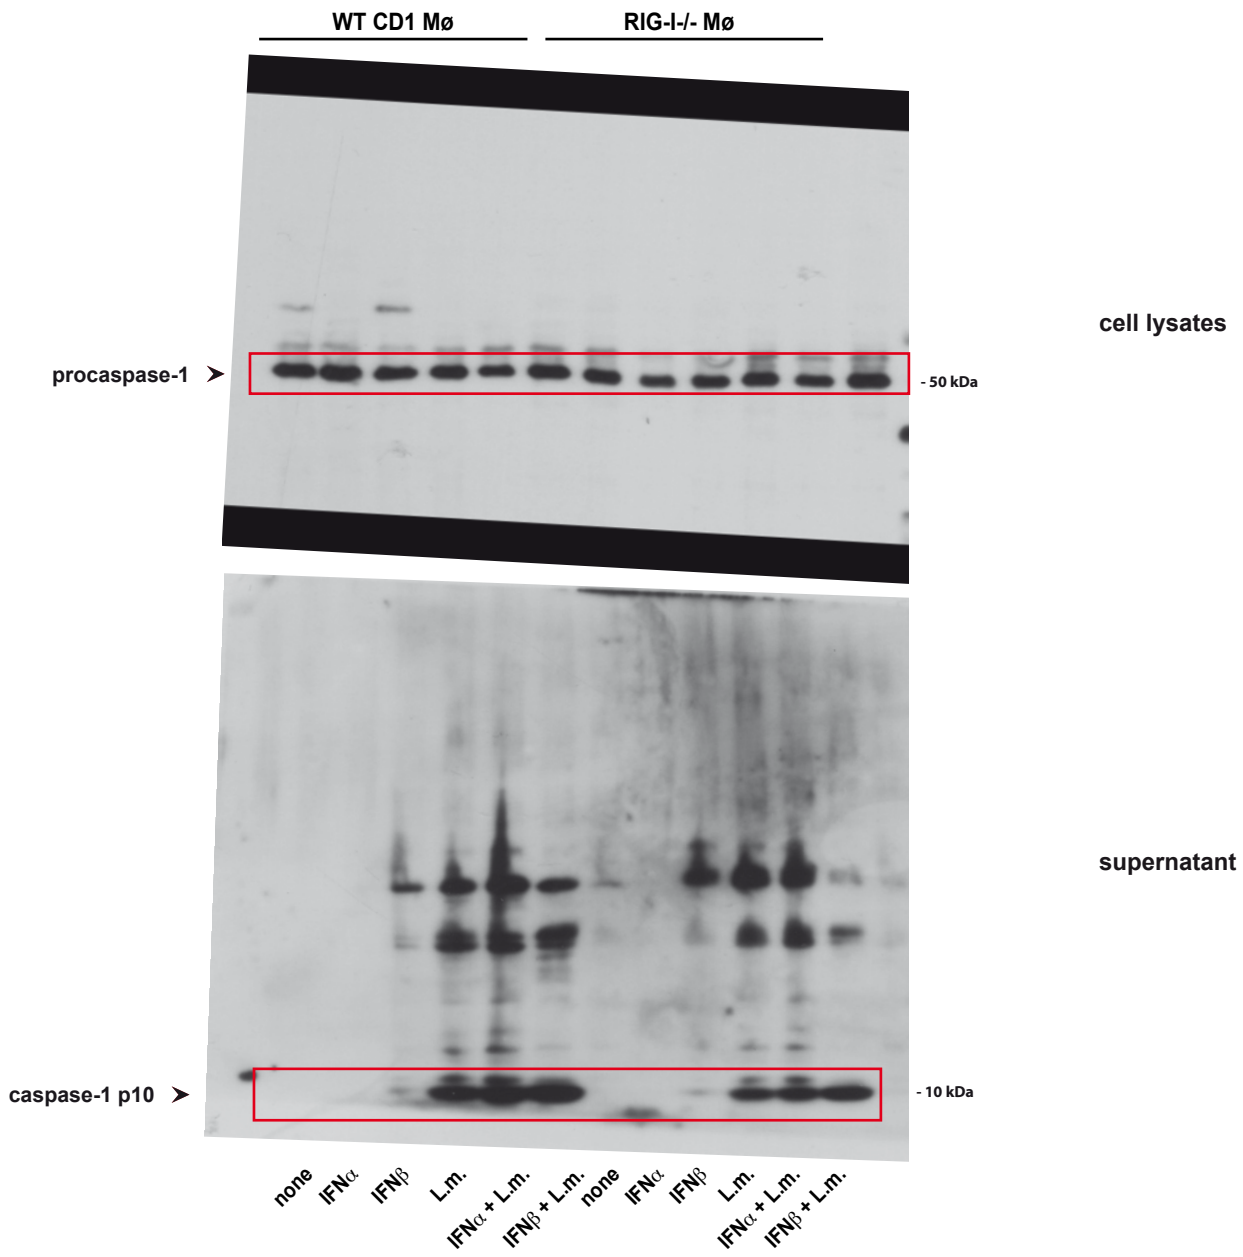

Supplement: emboj2012274s6.pdf [file emboj2012274s6.pdf]

# Source Data for Figure 5 J

original blots

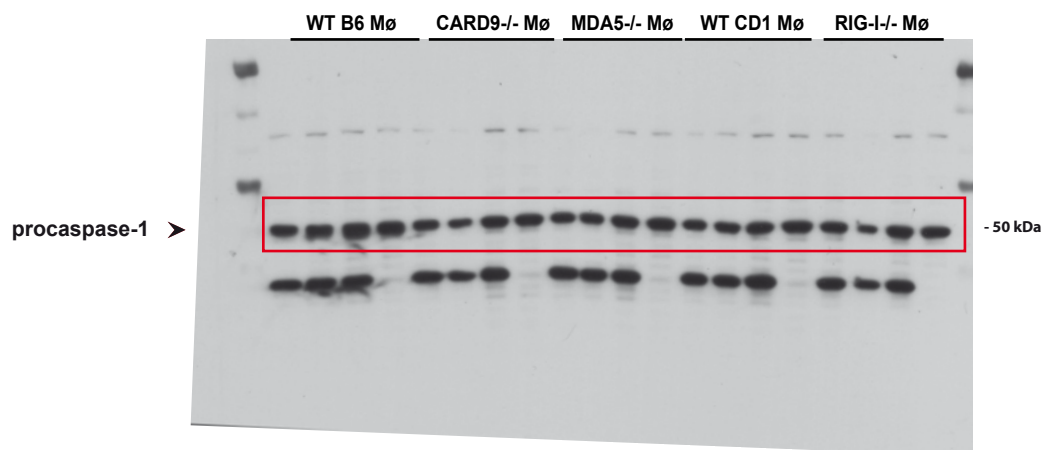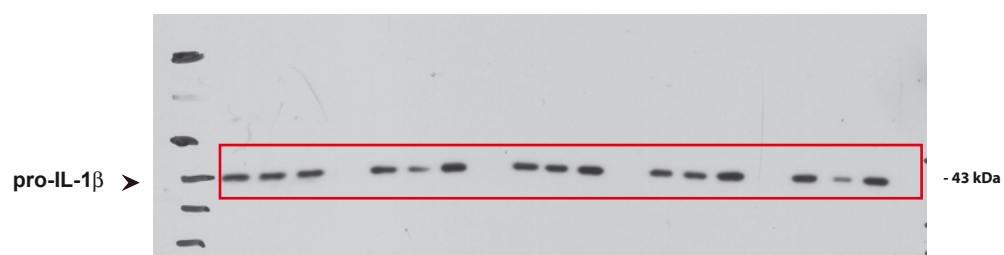

cell lysates

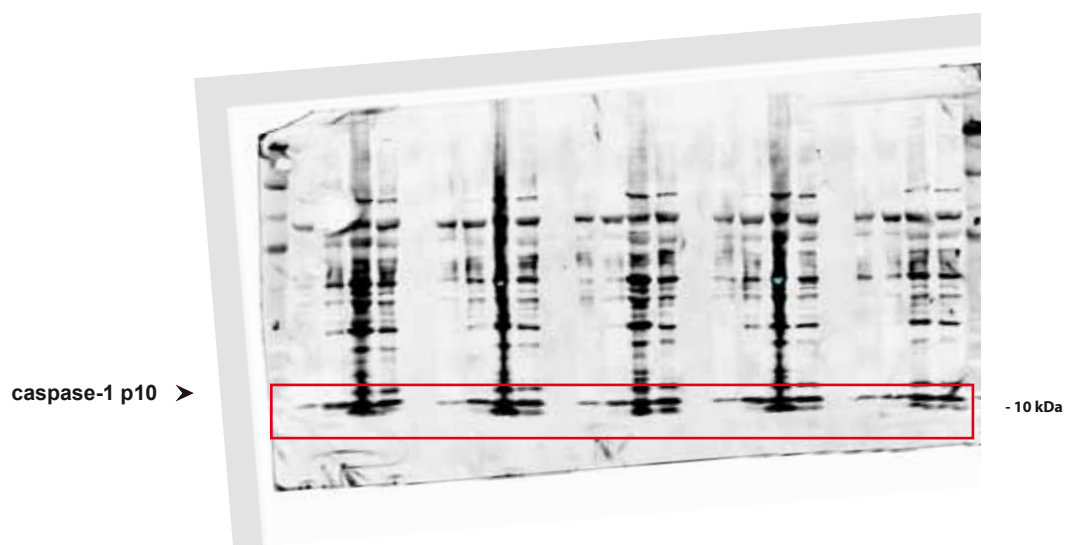

supernatant

Supplement: emboj2012274s7.pdf [file emboj2012274s7.pdf]

# Source Data for Figure 5 D

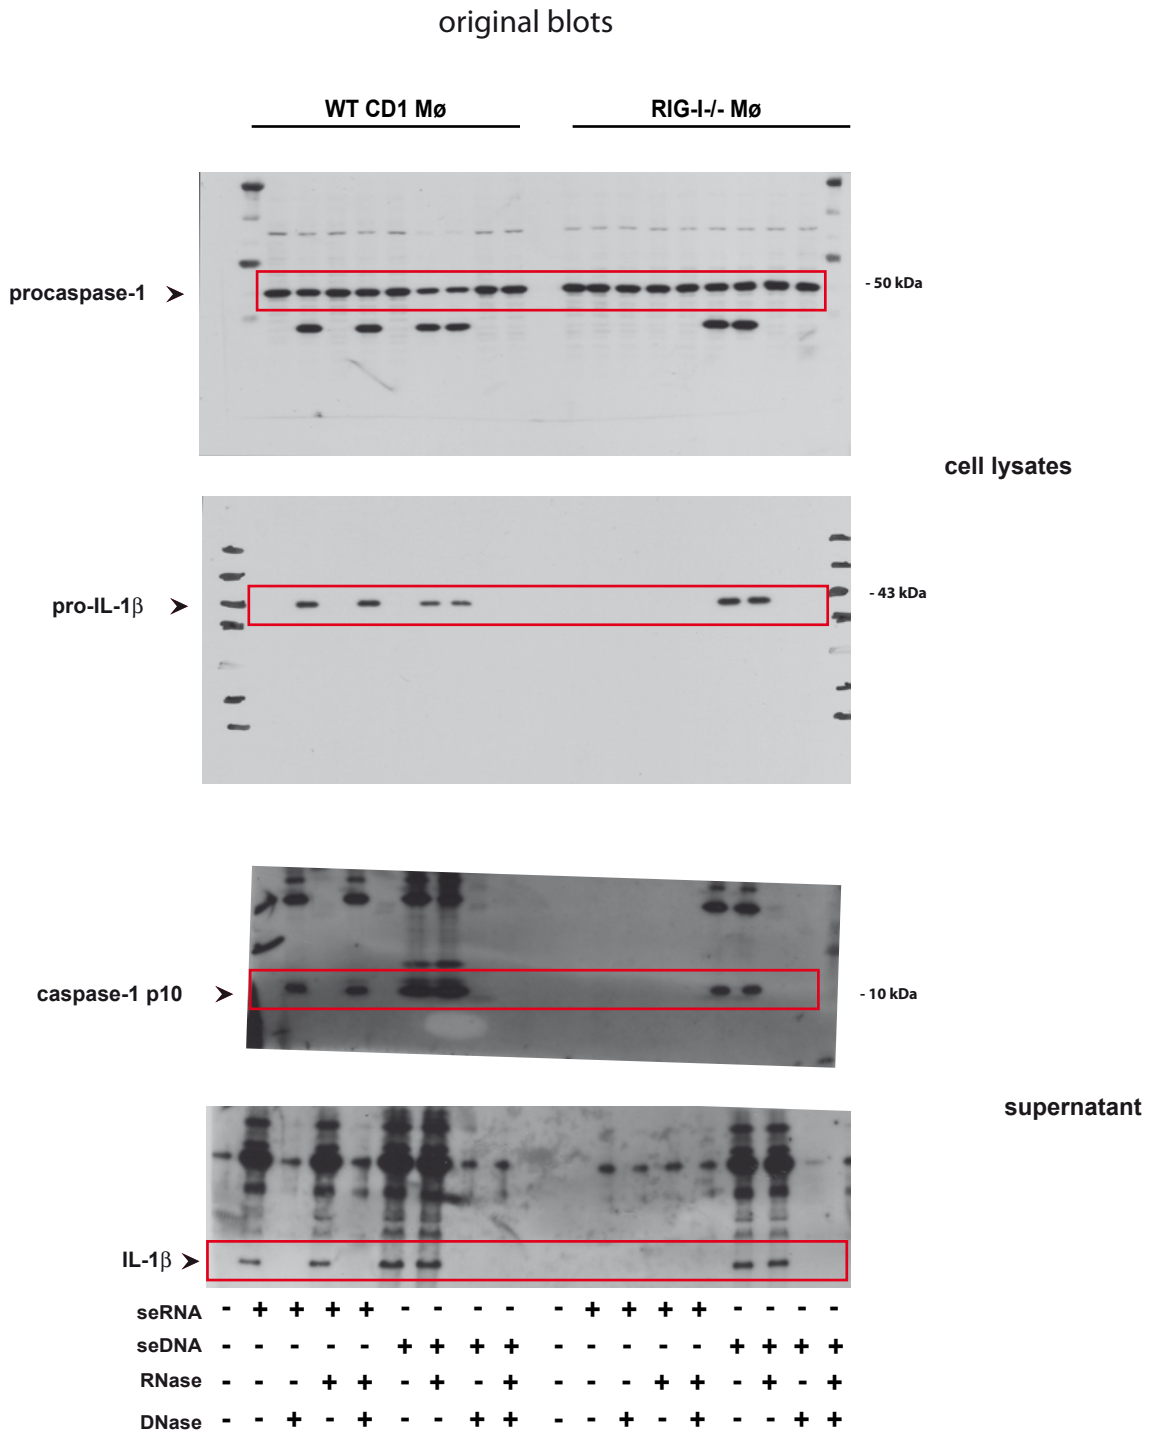

Supplement: emboj2012274s8.pdf [file emboj2012274s8.pdf]
